# Supplementary material for: Ectopic orbital meningioma: a retrospective case series
Source: Springer Nature journal article supplement (doi:10.1186/s12886-018-0959-z), 2018-11-12

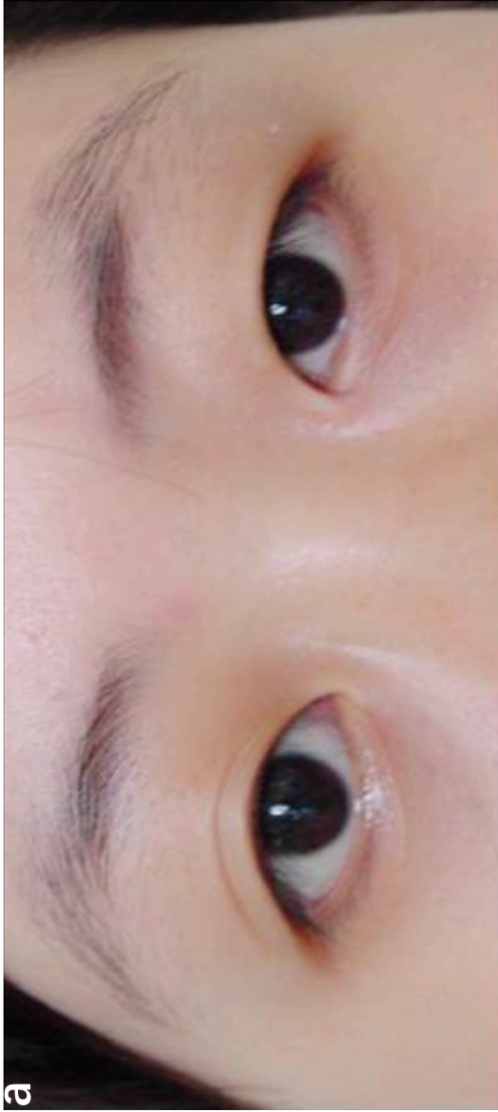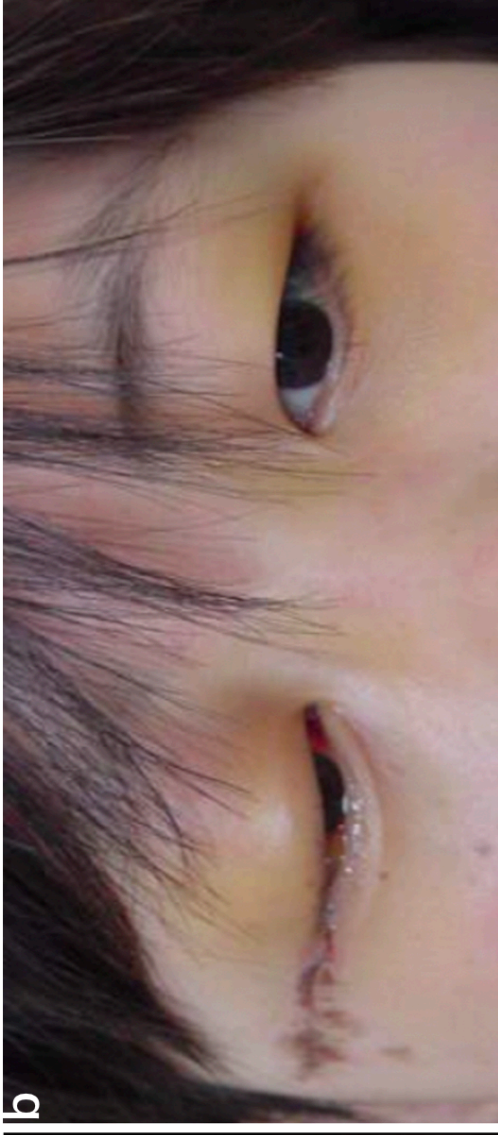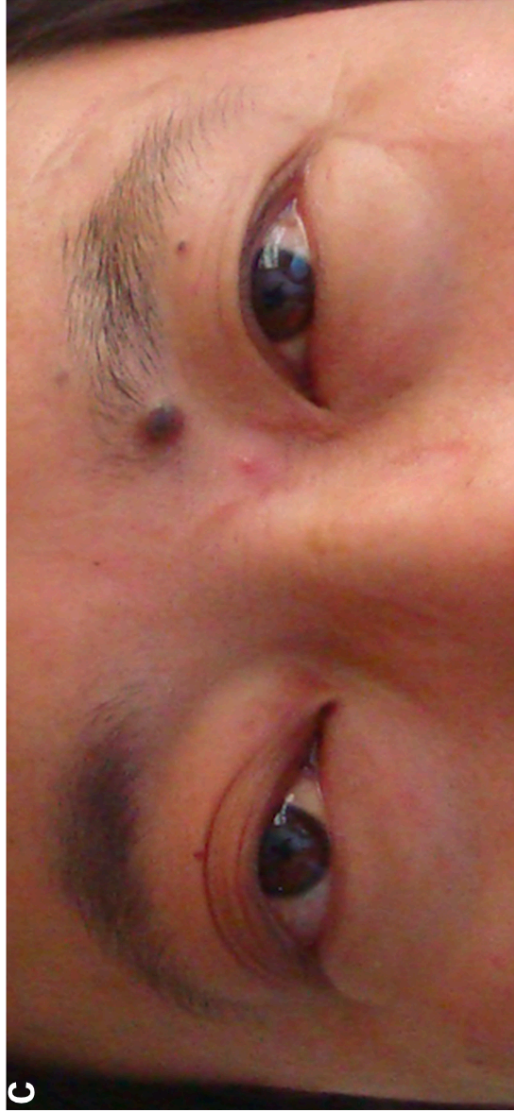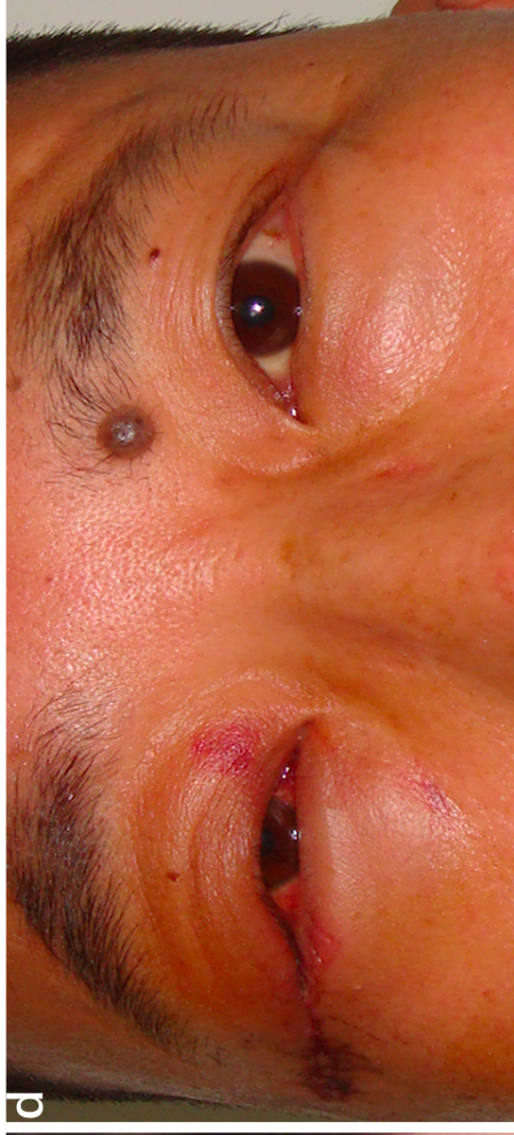

Supplement: MOESM1 [file 16267318]
